# Supplementary material for: High Incidence of Human Rabies Exposure in Northwestern Tigray, Ethiopia: A Four-Year Retrospective Study
Source: PLOS journal article supplement (doi:10.1371/journal.pntd.0005271), 2017-01-06
Supplement: S3 (10.1371/journal.pntd.0005271.s003) [file journal.pntd.0005271.s003]

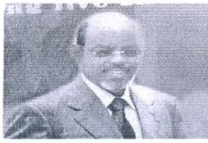

ሸረ ሆስፒታል ሱሐል  
SUHUL HOSPITAL  
SHIRE, Tigray, Ethiopia

ቁጥር 173/110/08  
Date 09 Aug 2016

ሕድረ ሕግ ሕግ

አብ ቢሮ ሕዳዊ ጥዕና ክልል ትግራይ  
ዘባ ሰሜን ምዕራብ  
ሱሐል ሆስፒታል

### To whom it may concern

**Ref: Confirmation letter on publication of data about rabies**

As per their request with the attached data collection format, Suhul Hospital has given four years data, 2012 to 2015, on rabies to researchers of Aksum University. Our data is recorded in a digital database at the hospital. With this letter, I confirm the integrity of the data and our informed consent that the data can be used for publication in a scientific journal.

With kind regards,

Tesfazgi Gebrehiwot  
Manager

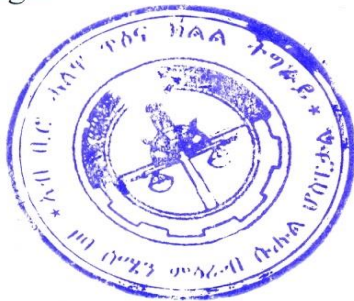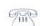

03-44-44-25-61 M. Director  
03-44-44-25-60 CEO  
03-44-44-25-64 Personnel

S.A

E-mail

Suhulhosp@yahoo.com

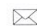

117

Shire Suhul Hospital, Tigray, Ethiopia
